# Supplementary material for: Nuclear pore complex integrity requires Lnp1, a regulator of cortical endoplasmic reticulum
Source: PubMed Central journal article supplement — Mol Biol Cell. 2015 Aug 1;26(15):2833–44. doi: 10.1091/mbc.E15-01-0053 (PMC4571342; doi:10.1091/mbc.e15-01-0053), 2015-08-01
Supplement: supp_E15-01-0053v1_CombinedSupMats.pdf [file supp_E15-01-0053v1_CombinedSupMats.pdf]

# Supplemental Materials

*Molecular Biology of the Cell*

Casey et al.

**Supplemental Figure 1.** Parental (A), *lnp1* $\Delta$ (B), *rtn1* $\Delta$ (C), or *lnp1* $\Delta$  *rtn1* $\Delta$  (D-K) cells were grown to early log phase at 23°C and processed for TEM. Scale bar, 500 nm. N marks the nucleus. Arrows point to NPCs. Asterisks indicate NPCs in regions of NPC clusters.

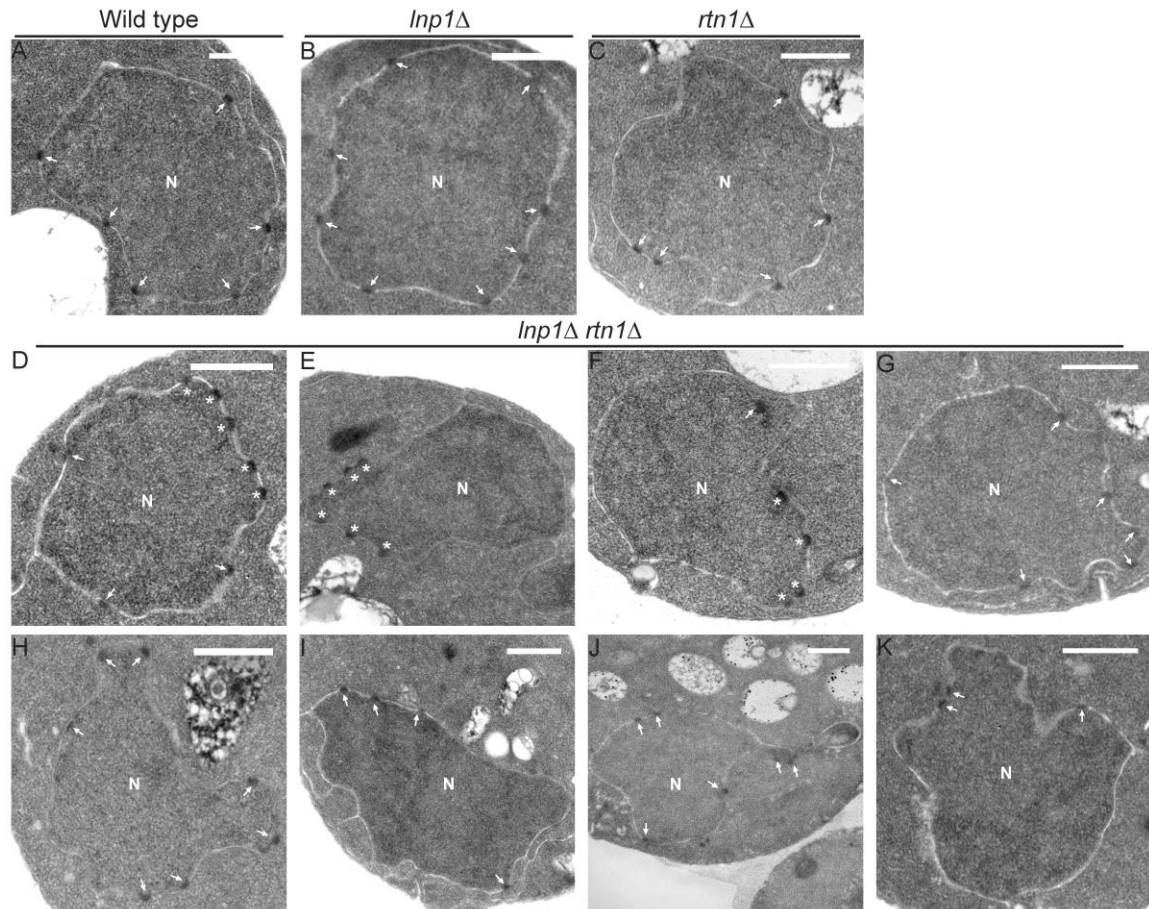

**Supplemental Figure 2.** Parental and *rtn1 $\Delta$ yop1 $\Delta$*  cells expressing Lnp1-GFP were grown to early log phase at 25°C and were visualized by fluorescence microscopy. Scale bar, 5  $\mu$ m.

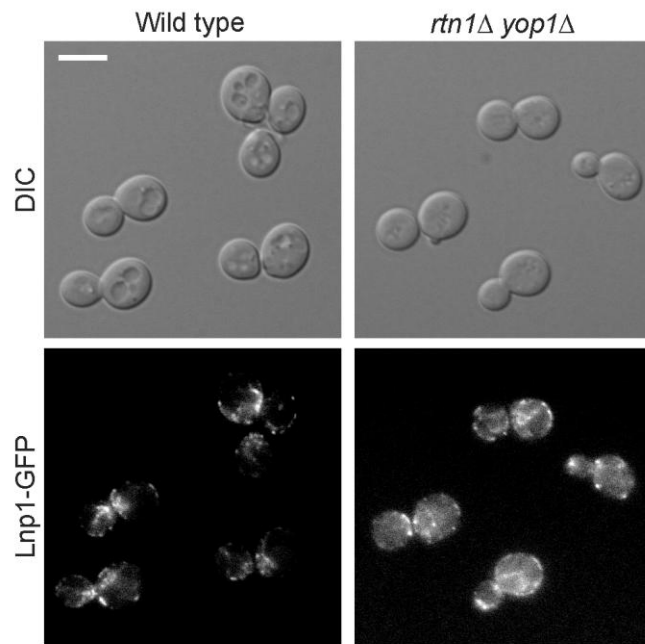

**Supplemental Figure 3.** Mutants were grown to early log phase at 25°C and five-fold serially diluted onto YPD plates at the indicated temperatures.

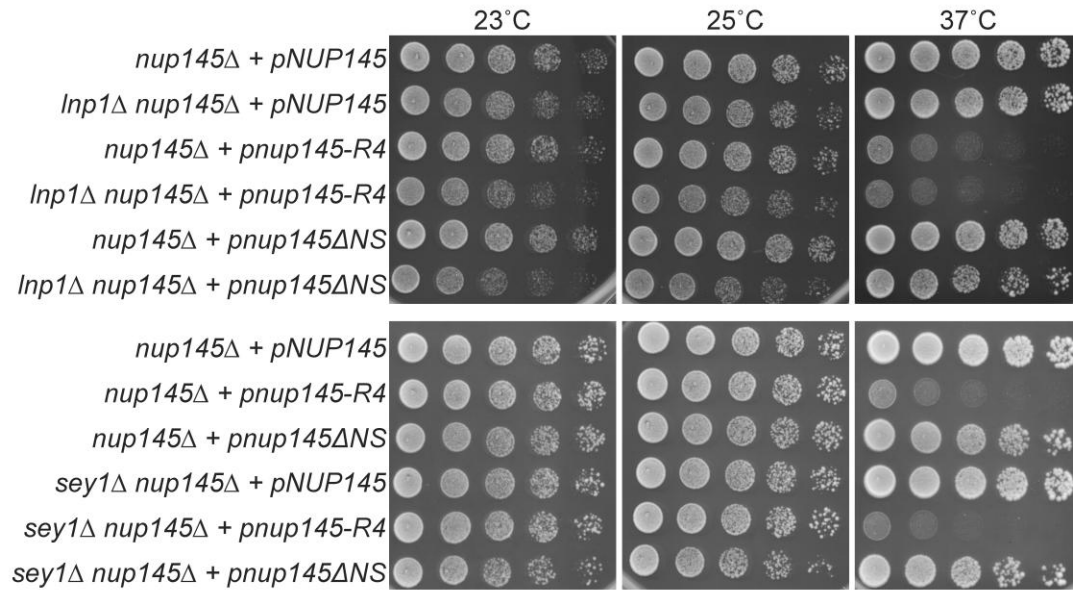

**Table S1 Yeast strains used in this study.**

| Strain         | Genotype                                                                                                     | Source                          |
|----------------|--------------------------------------------------------------------------------------------------------------|---------------------------------|
| BY4741         | <i>MATa his3Δ1 leu2Δ0 LYS2 met15Δ0 ura3Δ0</i>                                                                | (Mortimer and Johnston, 1986)   |
| BY4742         | <i>MATa his3Δ1 leu2Δ0 lys2Δ0 MET15 ura3Δ0</i>                                                                | (Mortimer and Johnston, 1986)   |
| Nic96-GFP      | <i>MATa NIC96-GFP:HIS3 his3Δ1 leu2Δ0 met15Δ0 ura3Δ0</i>                                                      | (Huh <i>et al.</i> , 2003)      |
| Sec61-GFP      | <i>MATa SEC61-GFP:HIS3 his3Δ1 leu2Δ0 met15Δ0 ura3Δ0</i>                                                      | (Huh <i>et al.</i> , 2003)      |
| Lnp1-GFP       | <i>MATa LNP1-GFP:HIS3 his3Δ1 leu2Δ0 met15Δ0 ura3Δ0</i>                                                       | (Huh <i>et al.</i> , 2003)      |
| Rtn1-GFP       | <i>MATa RTN1-GFP:HIS3 his3Δ1 leu2Δ0 met15Δ0 ura3Δ0</i>                                                       | (Huh <i>et al.</i> , 2003)      |
| NMY32          | <i>his3 200 trp1-901 leu2-3,112 ade2 LYS2::(lexAop)4-HIS3 URA3::(lexAop)8-lacZ ade2::(lexAop)8-ADE2 GAL4</i> | Dualsystems Biotech             |
| LGY101         | <i>MATα ura3-52 his3Δ200 leu2Δ1 rat7-1(ts)</i>                                                               | (Gorsch <i>et al.</i> , 1995)   |
| <i>lnp1Δ</i>   | <i>MATa lnp1::KanR his3Δ1 leu2Δ0 met15Δ0 ura3Δ0</i>                                                          | (Winzeler <i>et al.</i> , 1999) |
| <i>nup53Δ</i>  | <i>MATa nup53::KanR his3Δ1 leu2Δ0 met15Δ0 ura3Δ0</i>                                                         | (Winzeler <i>et al.</i> , 1999) |
| <i>nup59Δ</i>  | <i>MATa nup59::KanR his3Δ1 leu2Δ0 met15Δ0 ura3Δ0</i>                                                         | (Winzeler <i>et al.</i> , 1999) |
| <i>nup84Δ</i>  | <i>MATa nup84::KanR his3Δ1 leu2Δ0 met15Δ0 ura3Δ0</i>                                                         | (Winzeler <i>et al.</i> , 1999) |
| <i>nup85Δ</i>  | <i>MATa nup85::KanR his3Δ1 leu2Δ0 met15Δ0 ura3Δ0</i>                                                         | (Winzeler <i>et al.</i> , 1999) |
| <i>nup100Δ</i> | <i>MATa nup100::KanR his3Δ1 leu2Δ0 met15Δ0 ura3Δ0</i>                                                        | (Winzeler <i>et al.</i> , 1999) |
| <i>nup133Δ</i> | <i>MATa nup133::KanR his3Δ1 leu2Δ0 met15Δ0 ura3Δ0</i>                                                        | (Winzeler <i>et al.</i> , 1999) |
| <i>nup120Δ</i> | <i>MATa nup120::KanR his3Δ1 leu2Δ0 met15Δ0 ura3Δ0</i>                                                        | (Winzeler <i>et al.</i> , 1999) |
| <i>pom152Δ</i> | <i>MATa per152::KanR his3Δ1 leu2Δ0 met15Δ0 ura3Δ0</i>                                                        | (Winzeler <i>et al.</i> , 1999) |
| <i>pom34Δ</i>  | <i>MATa per34::KanR his3Δ1 leu2Δ0 met15Δ0 ura3Δ0</i>                                                         | (Winzeler <i>et al.</i> , 1999) |
| <i>pom33Δ</i>  | <i>MATa pom33::KanR his3Δ1 leu2Δ0 met15Δ0 ura3Δ0</i>                                                         | (Winzeler <i>et al.</i> , 1999) |
| <i>per33Δ</i>  | <i>MATa per33::KanR his3Δ1 leu2Δ0 met15Δ0 ura3Δ0</i>                                                         | (Winzeler <i>et al.</i> , 1999) |

|              |                                                                                     |                                 |
|--------------|-------------------------------------------------------------------------------------|---------------------------------|
| <i>rtn1Δ</i> | <i>MATα rtn1::KanRhis3Δ1leu2Δ0met15Δ0ura3Δ0</i>                                     | (Winzeler <i>et al.</i> , 1999) |
| <i>sey1Δ</i> | <i>MATα sey1::KanRhis3Δ1leu2Δ0met15Δ0ura3Δ0</i>                                     | (Winzeler <i>et al.</i> , 1999) |
| Swy4047      | <i>MATα Nup133::KanR RTN1-GFP:HIS3his3Δ1leu2Δ0lys2Δ0ura3Δ0</i>                      | This Study                      |
| Swy4798      | <i>MATα Nup133::KanR SEY1-GFP:HIS3his3Δ1leu2Δ0met15Δ0ura3Δ0</i>                     | This Study                      |
| Swy4802      | <i>MATα rtn1::KanR sey1::KanRhis3Δ1leu2Δ0ura3Δ0</i>                                 | This Study                      |
| Swy5285      | <i>MATα nup145::KanR his3Δ1 leu2Δ0 lys2Δ0 ura3Δ0 pNup145:URA</i>                    | This Study                      |
| Swy5390      | <i>MATα Inp1::KanR NIC96-GFP:HIS3his3Δ1leu2Δ0ura3Δ0</i>                             | This Study                      |
| Swy5432      | <i>MATα nup133::KanR LNP1-GFP:HIS3his3Δ1leu2Δ0ura3Δ0</i>                            | This Study                      |
| Swy5433      | <i>MATα rtn1::KanR yop1::KanR LNP1-GFP:HIS3his3Δ1leu2Δ0ura3Δ0</i>                   | This Study                      |
| Swy5459      | <i>MATα Inp1::KanR rtn1::KanRhis3Δ1leu2Δ0met15Δ05ura3Δ0</i>                         | This Study                      |
| Swy5462      | <i>MATα Inp1::KanR rtn1::KanR NIC96-GFP:HIS3his3Δ1leu2Δ0lys2Δ0ura3Δ0</i>            | This Study                      |
| Swy5463      | <i>MATα Inp1::KanR rtn1::KanR NIC96-GFP:HIS3his3Δ1leu2Δ0met15Δ0ura3Δ0</i>           | This Study                      |
| Swy5464      | <i>MATα Inp1::KanR sey1::KanR NIC96-GFP:HIS3 his3Δ1 leu2Δ0 ura3Δ0</i>               | This Study                      |
| Swy5465      | <i>MATα Inp1::KanR sey1::KanR NIC96-GFP:HIS3 his3Δ1 leu2Δ0 ura3Δ0</i>               | This Study                      |
| Swy5485      | <i>MATα Inp1::KanR pom152::HIS3 his3Δ1leu2Δ0lys2Δ0ura3Δ0</i>                        | This Study                      |
| Swy5486      | <i>MATα Inp1::KanR rtn1::KanRhis3Δ1leu2Δ0lys2Δ0ura3Δ0</i>                           | This Study                      |
| Swy5488      | <i>MATα Inp1::KanR pom34::his3Δ1leu2Δ0lys2Δ0ura3Δ0</i>                              | This Study                      |
| Swy5489      | <i>MATα Inp1::KanR pom34::HIS3 pom152::HIS3 his3Δ1leu2Δ0lys2Δ0ura3Δ0</i>            | This Study                      |
| Swy5534      | <i>MATα rtn1::KanR NIC96-GFP:HIS3his3Δ1leu2Δ0met15Δ0ura3Δ0</i>                      | This Study                      |
| Swy5535      | <i>MATα rtn1::KanR NIC96-GFP:HIS3his3Δ1leu2Δ0lys2Δ0ura3Δ0</i>                       | This Study                      |
| Swy5563      | <i>MATα Inp1::KanR rtn1::KanR sey1::KanR NIC96-GFP:HIS3his3Δ1leu2Δ0lys2Δ0ura3Δ0</i> | This Study                      |
| Swy5564      | <i>MATα Inp1::KanR rtn1::KanR sey1::KanR NIC96-GFP:HIS3his3Δ1leu2Δ0lys2Δ0ura3Δ0</i> | This Study                      |
| Swy5589      | <i>MATα Inp1::loxP-spHIS5rtn1::KanRhis3Δ1leu2Δ0lys2Δ0met15Δ0ura3Δ0</i>              | This Study                      |
| Swy5847      | <i>MATα ura3-52 his3Δ200 leu2Δ1 rat7-1(ts) LNP1-GFP:HIS</i>                         | This Study                      |
| Swy5869      | <i>MATα Inp1::KanR nup133::KanRhis3Δ1leu2Δ0met15Δ0ura3Δ0</i>                        | This Study                      |

|         |                                                                                      |            |
|---------|--------------------------------------------------------------------------------------|------------|
| Swy5918 | <i>MATα Inp1::KanR<br/>nup59::KanRhis3Δ1leu2Δ0met15Δ0ura3Δ0</i>                      | This Study |
| Swy5919 | <i>MATα Inp1::KanR<br/>nup59::KanRhis3Δ1leu2Δ0met15Δ0ura3Δ0</i>                      | This Study |
| Swy5926 | <i>MATα Inp1::KanRnup145::KanR his3Δ1 leu2Δ0 lys2Δ0<br/>ura3Δ0 pNup145:URA</i>       | This Study |
| Swy5931 | <i>MATα nup120::KanR LNP1-<br/>GFP:HIS3his3Δ1leu2Δ0met15Δ0ura3Δ0</i>                 | This Study |
| Swy5932 | <i>MATα Inp1::KanR<br/>nup120::KanRhis3Δ1leu2Δ0met15Δ0ura3Δ0</i>                     | This Study |
| Swy5957 | <i>MATα Inp1::KanR nup53::KanR<br/>nup59::KanRhis3Δ1leu2Δ0met15Δ0ura3Δ0</i>          | This Study |
| Swy5974 | <i>MATα Inp1::KanRnup85::KanR his3Δ1 leu2Δ0<br/>lys2Δ0ura3Δ0 pNup145:URA</i>         | This Study |
| Swy5976 | <i>MATα nup53::KanR<br/>nup59::KanRhis3Δ1leu2Δ0lys2Δ0ura3Δ0</i>                      | This Study |
| Swy5984 | <i>MATα Inp1::KanR<br/>nup100::KanRhis3Δ1leu2Δ0met15Δ0ura3Δ0</i>                     | This Study |
| Swy5991 | <i>MATα rtn1::KanR sey1::KanR NIC96-<br/>GFP:HIS3his3Δ1leu2Δ0met15Δ0ura3Δ0</i>       | This Study |
| Swy5992 | <i>MATα rtn1::KanR sey1::KanR NIC96-<br/>GFP:HIS3his3Δ1leu2Δ0met15Δ0lys2Δ0ura3Δ0</i> | This Study |
| Swy5993 | <i>MATα Inp1::KanRnup84::KanR his3Δ1 leu2Δ0 met15Δ0<br/>ura3Δ0 pNup145:URA</i>       | This Study |
| Swy6015 | <i>MATα Inp1::KanRura3-52 his3Δ200 leu2Δ1 rat7-1(ts)</i>                             | This Study |
| Swy6017 | <i>MATα nup85::KanR sey1::KanR his3Δ1 leu2Δ0<br/>met15Δ0ura3Δ0</i>                   | This Study |
| Swy6034 | <i>MATα sey1::KanR NIC96-<br/>GFP:HIS3his3Δ1leu2Δ0lys2Δ0met15Δ0ura3Δ0</i>            | This Study |
| Swy6046 | <i>MATα rtn1::KanR sey1::KanR SEC61-GFP:HIS3his3Δ1leu2Δ0<br/>ura3Δ0</i>              | This Study |
| Swy6047 | <i>MATα Inp1::KanR SEC61-<br/>GFP:HIS3his3Δ1leu2Δ0lys2Δ0ura3Δ0</i>                   | This Study |
| Swy6048 | <i>MATα sey1::KanR SEC61-GFP:HIS3his3Δ1leu2Δ0ura3Δ0</i>                              | This Study |
| Swy6049 | <i>MATα Inp1::KanR sey1::KanR SEC61-<br/>GFP:HIS3his3Δ1leu2Δ0ura3Δ0</i>              | This Study |
| Swy6050 | <i>MATα Inp1::KanR rtn1::KanR SEC61-<br/>GFP:HIS3his3Δ1leu2Δ0lys2Δ0ura3Δ0</i>        | This Study |
| Swy6095 | <i>MATα Inp1::KanR rtn1::KanR sey1::KanR SEC61-<br/>GFP:HIS3his3Δ1leu2Δ0ura3Δ0</i>   | This Study |
| Swy6104 | <i>MATα rtn1::KanR SEC61-GFP:HIS3his3Δ1leu2Δ0lys2Δ0<br/>ura3Δ0</i>                   | This Study |

Gorsch, L.C., Dockendorff, T.C., and Cole, C.N. (1995). A conditional allele of the novel repeat-containing yeast nucleoporin RAT7/NUP159 causes both rapid cessation of mRNA export and reversible clustering of nuclear pore complexes. *J Cell Biol* 129, 939-955.

Huh, W.K., Falvo, J.V., Gerke, L.C., Carroll, A.S., Howson, R.W., Weissman, J.S., and O'Shea, E.K. (2003). Global analysis of protein localization in budding yeast. *Nature* 425, 686-691.

Mortimer, R.K., and Johnston, J.R. (1986). Genealogy of principal strains of the yeast genetic stock center. *Genetics* 113, 35-43.

Winzeler, E.A., Shoemaker, D.D., Astromoff, A., Liang, H., Anderson, K., Andre, B., Bangham, R., Benito, R., Boeke, J.D., Bussey, H., Chu, A.M., Connelly, C., Davis, K., Dietrich, F., Dow, S.W., El Bakkoury, M., Foury, F., Friend, S.H., Gentalen, E., Giaever, G., Hegemann, J.H., Jones, T., Laub, M., Liao, H., Liebundguth, N., Lockhart, D.J., Lucau-Danila, A., Lussier, M., M'Rabet, N., Menard, P., Mittmann, M., Pai, C., Rebischung, C., Revuelta, J.L., Riles, L., Roberts, C.J., Ross-MacDonald, P., Scherens, B., Snyder, M., Sookhai-Mahadeo, S., Storms, R.K., Véronneau, S., Voet, M., Volckaert, G., Ward, T.R., Wysocki, R., Yen, G.S., Yu, K., Zimmermann, K., Philippsen, P., Johnston, M., and Davis, R.W. (1999). Functional characterization of the *S. cerevisiae* genome by gene deletion and parallel analysis. *Science* 285, 901-906.

**Table S2 Plasmids used in this study**

| Plasmid     | Description                         | Resource                            |
|-------------|-------------------------------------|-------------------------------------|
| pMal-Cri    | MBP expression vector               | New England Biosciences             |
| pRS315      | <i>CEN/LEU2</i>                     | (Sikorski and Hieter, 1989)         |
| pRS316      | <i>CEN/URA3</i>                     | (Sikorski and Hieter, 1989)         |
| pRS425      | <i>2u/LEU2</i>                      | (Christianson <i>et al.</i> , 1992) |
| pRS315.NDC1 | <i>NDC1/CEN/LEU2</i>                | (Chial <i>et al.</i> , 1998)        |
| pSJ1287     | <i>pBT3-STE-Ndc1</i>                | (Casey <i>et al.</i> , 2012)        |
| pSJ1469     | <i>pR3N-Yop1</i>                    | (Casey <i>et al.</i> , 2012)        |
| Psw300      | <i>CEN/HIS3/NUP145-R4</i>           | (Emtage <i>et al.</i> , 1997)       |
| Psw388      | <i>CEN/HIS3/Nup145ΔNS</i>           | (Emtage <i>et al.</i> , 1997)       |
| Psw3190     | <i>CEN/LEU2/POM34-MYC-SUC2-MYC</i>  | This Study                          |
| Psw3192     | <i>CEN/LEU2/POM152-MYC-SUC2-MYC</i> | This Study                          |
| Psw3420     | <i>CEN/LEU2/RTN1-GFP</i>            | (Dawson <i>et al.</i> , 2009)       |
| Psw3421     | <i>CEN/LEU2/rtn1-K48I-GFP</i>       | (Dawson <i>et al.</i> , 2009)       |
| Psw3905     | <i>CEN/LEU2/LNP1</i>                | This Study                          |
| Psw3906     | <i>2u/LEU2/LNP1</i>                 | This Study                          |
| Psw3975     | <i>MBP-LNP1cterm</i>                | This Study                          |
| Psw4000     | <i>CEN/LEU2/LNP1-MYC-SUC2-MYC</i>   | This Study                          |
| Psw4001     | <i>pR3N-RTN1</i>                    | This Study                          |
| Psw4028     | <i>2u/LEU2/RTN1</i>                 | This Study                          |
| Psw4029     | <i>2u/LEU2/LNP1-GFP</i>             | This Study                          |
| Psw4031     | <i>2u/LEU2/rtn1-K48I</i>            | This Study                          |
| Psw4032     | <i>2u/LEU2/LNP1Dznfn-GFP</i>        | This Study                          |
| Psw4071     | <i>MBP-LNP1ctermDznfn</i>           | This Study                          |
| Psw4086     | <i>CEN/LEU2/LNP1Dznfn</i>           | This Study                          |
| Psw4087     | <i>2u/LEU2/LNP1Dznfn</i>            | This Study                          |

Casey, A.K., Dawson, T.R., Chen, J., Friederichs, J.M., Jaspersen, S.L., and Went, S.R. (2012). Integrity and Function of the *Saccharomyces cerevisiae* Spindle Pole Body Depends on Connections Between the Membrane Proteins Ndc1, Rtn1, and Yop1. *Genetics* 192, 441-455.

Chial, H.J., Rout, M.P., Giddings, T.H., and Winey, M. (1998). *Saccharomyces cerevisiae* Ndc1p is a shared component of nuclear pore complexes and spindle pole bodies. *J Cell Biol* 143, 1789-1800.

Christianson, T.W., Sikorski, R.S., Dante, M., Shero, J.H., and Hieter, P. (1992). Multifunctional yeast high-copy-number shuttle vectors. *Gene* 110, 119-122.

Dawson, T.R., Lazarus, M.D., Hetzer, M.W., and Went, S.R. (2009). ER membrane-bending proteins are necessary for de novo nuclear pore formation. *J Cell Biol* 184, 659-675.

Emtage, J.L., Bucci, M., Watkins, J.L., and Went, S.R. (1997). Defining the essential functional regions of the nucleoporin Nup145p. *J Cell Sci* 110 ( Pt 7), 911-925.

Sikorski, R.S., and Hieter, P. (1989). A system of shuttle vectors and yeast host strains designed for efficient manipulation of DNA in *Saccharomyces cerevisiae*. *Genetics* 122, 19-27.
